# Supplementary material
Source: PubMed Central journal article supplement (PMC2755694)
Supplement: supp_M109.013169_jbc.M109.013169-1.pdf [file supp_M109.013169_jbc.M109.013169-1.pdf]

**Supplemental Data for Tse et al., B cell receptor-induced phosphorylation of Pyk2 and focal adhesion kinase involves integrins and the Rap GTPases and is required for B cell spreading**

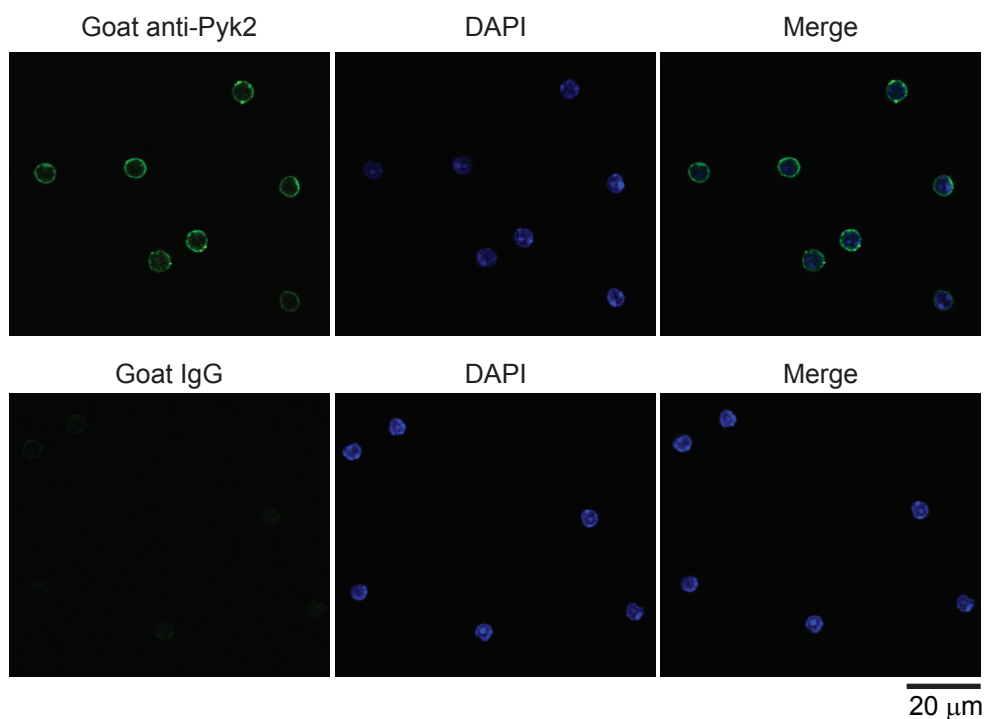

**Supplemental Figure 1. Immunofluorescent staining of Pyk2.** Resting splenic B cells were permeabilized and stained with goat anti-Pyk2 (upper panels), or with non-specific goat IgG (lower panels), plus Alexa 488-conjugated donkey anti-goat IgG secondary Ab. Nuclei were visualized with DAPI (blue).

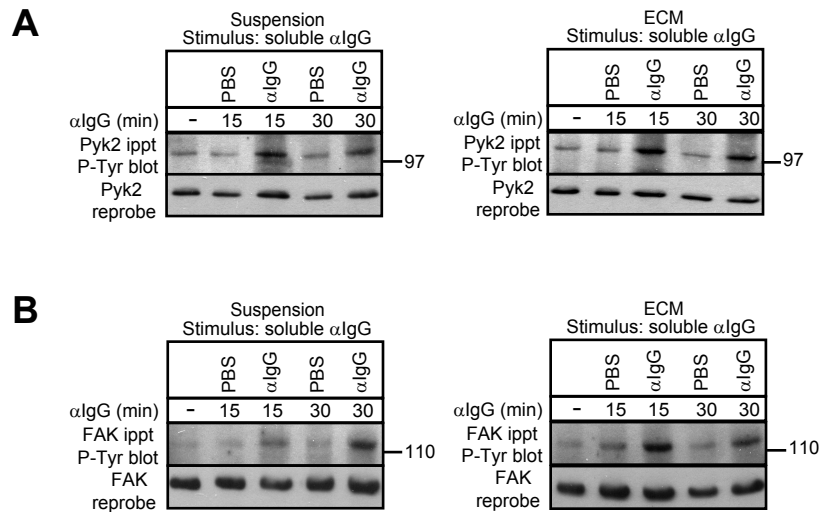

**Supplemental Figure 2. BCR-induced phosphorylation of Pyk2 and FAK.** A20 cells were kept in suspension (left panels) or plated on collagen/fibronectin ECM (right panels) for 30 min before being stimulated with 20  $\mu$ g/ml soluble anti-IgG or PBS for the indicated times. For the unstimulated control (-), cells were kept in suspension or plated on ECM for 30 min and then left unstimulated for another 30 min before being lysed. *A*, Anti-Pyk2 immunoprecipitates were analyzed by immunoblotting with the 4G10 anti-P-Tyr Ab. The blots were then reprobed with Abs to Pyk2. *B*, Anti-FAK immunoprecipitates were analyzed by immunoblotting with the 4G10 anti-P-Tyr Ab. The blots were then reprobed with Abs to FAK.  $\alpha$ IgG, anti-IgG Ab; ECM, extracellular matrix
